# Supplementary material for: Cigarette smoking, nicotine dependence and anxiety disorders: a systematic review of population-based, epidemiological studies
Source: BMC Med. 2012 Oct 19;10:123. doi: 10.1186/1741-7015-10-123 (PMC3523047; doi:10.1186/1741-7015-10-123)
Supplement: Additional file 4 — Table S4. Quasiprospective studies investigating influence of smoking and nicotine dependence (ND) on subsequent risk of anxiety disorders. [file 1741-7015-10-123-S4.XLSX]

## Sheet: Sheet1
STUDY	Study Population	Prospective/Retrospective Follow up Process	Definition of Anxiety Disorder Diagnosis	Definition of Smoking Status or Nicotine Dependence	Parameters Measured	Results
Breslau et al , 2004 33	Data from the NCS (outlined previously)	Utilised recall of age of onset smoking & PD	M-CIDI	Smoking status from NCS (outlined previously) Early onset of daily smoking was defined as onset falling in the earliest 10% of the age of onset distribution of all same sex members of the smoker’s birth cohort who smoked daily	Risk of Individual AD onset: Pre-exisiting daily smoker (onset>1yr prior) vs. non-daily smoking ND smoker vs. Non-ND smoker / ND (Past) non-smoker vs. Non-ND (past) non-smoker Temporal relationship of smoking to AD: Current smoker, past smoker or recent quitter.	Odds of AD onset: Adjusted OR (95% CI)*: PD: Pre-existing daily smoking (onset >1 yr prior) vs. non-daily smoking = OR 2.6 (1.2-5.4)* ND smoker vs. non-daily smoker = OR 2.7 (1.2-6.0)** Non ND smoker vs. non-daily smoker = OR 2.3 (1.2-4.4)** ND past smoker vs. non-daily smoker = OR 0.4 (0.2-0.9)** Non ND past smoker vs. non-daily smoker= OR 0.7 (0.3-1.8)** Current smoker vs. past smoker = Wald Ch…
Breslau et al, 1999 14	Sample randomly drawn from 21-30 yrold individuals from a large HMO (general population) as part of the Detroit Epidemiologic Study (DES)(n=1007) ; and Participants a part of the National Comorbidity Survey (NCS), a stratified, multistage probability sample of US non-institutionalised residents age 15-54. Respondents (n= 4411) who undertook the tobacco use component of the NCS survey were include…	Prospective Followup: DES: Baseline assessment occurred in 1989 (n=1007) Follow up 1 = 1990 Follow up 2 = 1992 Follow up 3 = 1994 (Complete follow up data available for n=974)	NIMH-DIS, revised to cover DSM-III-R criteria by face to face interviews for the DES; and M-CIDI for DSM-III-R criteria (NCS)	Self Report Smoking: Daily smoking = smoking daily for >=1 month	HR of PD onset: Prior Daily smoking vs. Prior No Daily smoking Prior daily smokers who continued to smoke vs. Prior daily smokers who didn't continue to smoke Prior daily smokers who quit vs. Prior daily smokers who didn't quit	HR of PD onset: Adjusted HR (95% CI)*: DES: Prior daily smoking vs. No prior daily smoking = HR 4.73 (2.36-9.49)*, HR 13.13 (4.41-39.10)** DES: Prior daily smokers who continued to smoke vs. Prior daily smokers who didn't continue to smoke = HR 14.46 (4.81 -43.5)** DES: Prior daily smokers who quit vs. Prior daily smokers who didn't quit = HR 0.51 (0.12-2.28)** NCS: Prior daily smoking vs. No pri…
Koenen et al, 2005 31	Sample drawn from national VET registry, a male-male twin pair registry of vietnam veterans where both siblings subsequently served in the Vietnam war era. Data taken from the Harvard Twin Study of Drug Abuse and Dependence (n=6744).	Retrospective data of age of onset utilised from the DISC to undertake prospective predictions	DISC 3 for DSM-III-R criteria	ND by DISC-3 for DSM-III-R criteria	Odds of PTSD onset (amongst those trauma exposed): ND vs. no ND (onset prior to trauma)	Odds of PTSD onset: Adjusted OR (95% CI)*: ND vs. no ND = OR 2.24(1.78-2.83)*, p<.001 * Time dependent covariates were conduct disorder, major depression, alcohol and drug abuse/dependence * Estimates for ND were adjusted for zygosity, minority race, father did not graduate from high school, mother did not graduate from high school, maternal/paternal depression, maternal/paternal alcohol problems…
